# Supplementary material for: Heat-tolerant Hot Pepper Exhibits Constant Photosynthesis Via Increased 4 Transpiration Rate, High Proline Content and Fast Recovery in Heat Stress 5 Condition
Source: Preprints.org preprint supplement (doi:10.20944/preprints202107.0348.v1), 2021-07-15
Supplement: Supplementary file [file supplementary]

**Manuscript title:** Heat-tolerant hot pepper exhibits constant photosynthesis via increased transpiration rate, high proline content and fast recovery in heat stress condition

**Authors:** Sherzod Nigmatullayevich Rajametov<sup>1†</sup>, Eun Young Yang<sup>1†</sup>, Myeong Cheoul Cho<sup>1</sup>, Soo Young Chae<sup>1</sup>, Hyo Bong Jeong<sup>1</sup>, and Won Byoung Chae<sup>2\*</sup>

**Affiliation:** <sup>1</sup>*National Institute of Horticultural & Herbal Science, Rural Development Administration, Wanju, 55365, Republic of Korea*

<sup>2</sup>*Department of Environmental Horticulture, Dankook University, Cheonan 31116, Republic of Korea*

#### **Mailing addresses**

*Sherzod Rajametov, e-mail: sherzod\_2004@list.ru*

*Eun Young Yang, e-mail: yangyang2@korea.kr*

*Myeong Cheoul Cho, e-mail: chomc@korea.kr*

*Soo Young Chae, e-mail: cotez@korea.kr*

*Hyo Bong Jeong, e-mail: bong9846@korea.kr*

*Won Byoung Chae, e-mail: wbcae75@dankook.ac.kr*

#### **<sup>†</sup> Equal contribution**

**\*Correspondence:** Won Byoung Chae. Department of Environmental Horticulture, Dankook University, Cheonan 31116, Republic of Korea

Phone: 82-41-550-3642

**Email:** wbchae75@dankook.ac.kr

**Supplementary Table S1.** Effects of heat treatment on the growth of hot pepper seedlings with 8-10 true leaves grown in a growth chamber maintaining 42°C for 10 days. All the values are the mean  $\pm$  standard deviations (n = 3).

| Cultivar    | Plant height (cm) |                | Diff. (%) | Root length (cm) |                | Diff. (%) | Shoot fresh weight (g) |               | Diff. (%) | Root fresh weight (g) |               | Diff. (%) |
|-------------|-------------------|----------------|-----------|------------------|----------------|-----------|------------------------|---------------|-----------|-----------------------|---------------|-----------|
|             | NT                | HT             |           | NT               | HT             |           | NT                     | HT            |           | NT                    | HT            |           |
| Chyung Yang | 42.8 $\pm$ 2.1    | 30.2 $\pm$ 0.9 | -29.4     | 10.2 $\pm$ 0.4   | 12.0 $\pm$ 0.6 | 17.6      | 13.7 $\pm$ 0.7         | 9.7 $\pm$ 1.1 | -29.5     | 2.7 $\pm$ 0.4         | 1.4 $\pm$ 0.2 | -47.8     |
| NW Bigarim  | 43.5 $\pm$ 2.2    | 32.3 $\pm$ 2.2 | -25.7     | 15.7 $\pm$ 0.3   | 15.0 $\pm$ 0.6 | -4.3      | 16.1 $\pm$ 1.1         | 8.8 $\pm$ 0.9 | -45.2     | 4.6 $\pm$ 0.3         | 3.7 $\pm$ 0.4 | -19.6     |

NT- no treated plants, HT – heat treated plants.

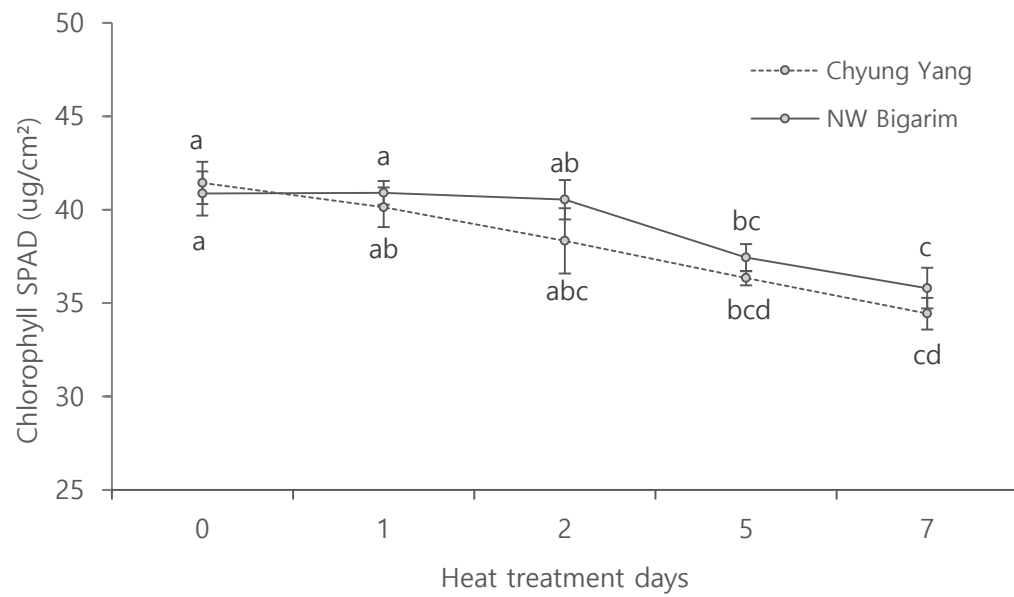

**Supplementary Figure S1.** Response of chlorophyll content in pepper leaves on heat stress. Vertical bars represent standard deviations ( $n = 3$ ). Different letters indicate significant differences by Duncan's multiple range test at  $p < 0.05$ .

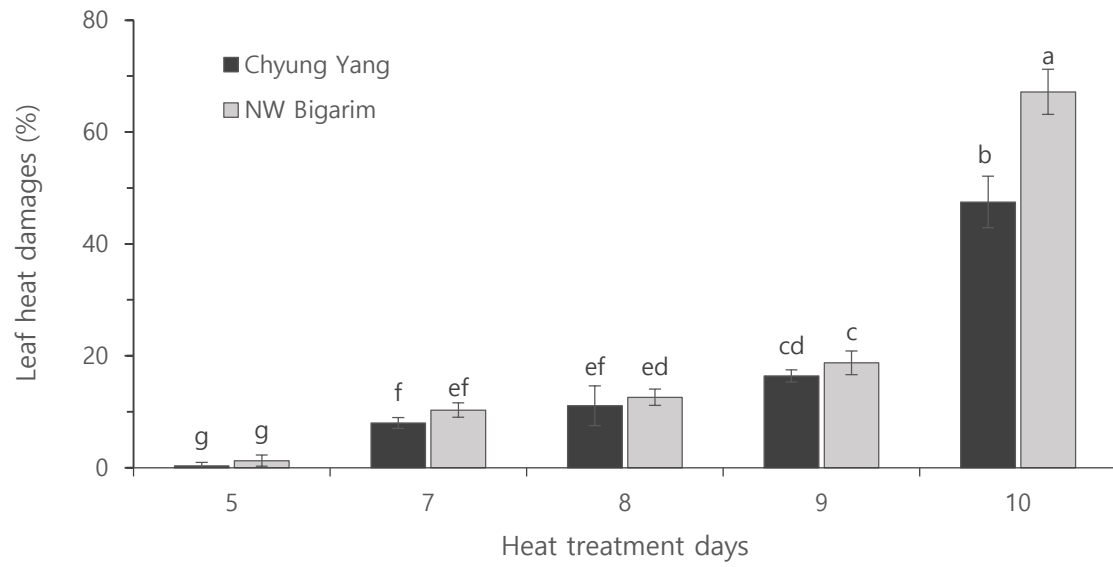

**Supplementary Figure S2.** Changes in leaf heat damages among pepper seedlings. Vertical bars represent standard deviations ( $n = 4$ ). Different letters indicate significant differences by Duncan's multiple range test at  $p < 0.05$ .

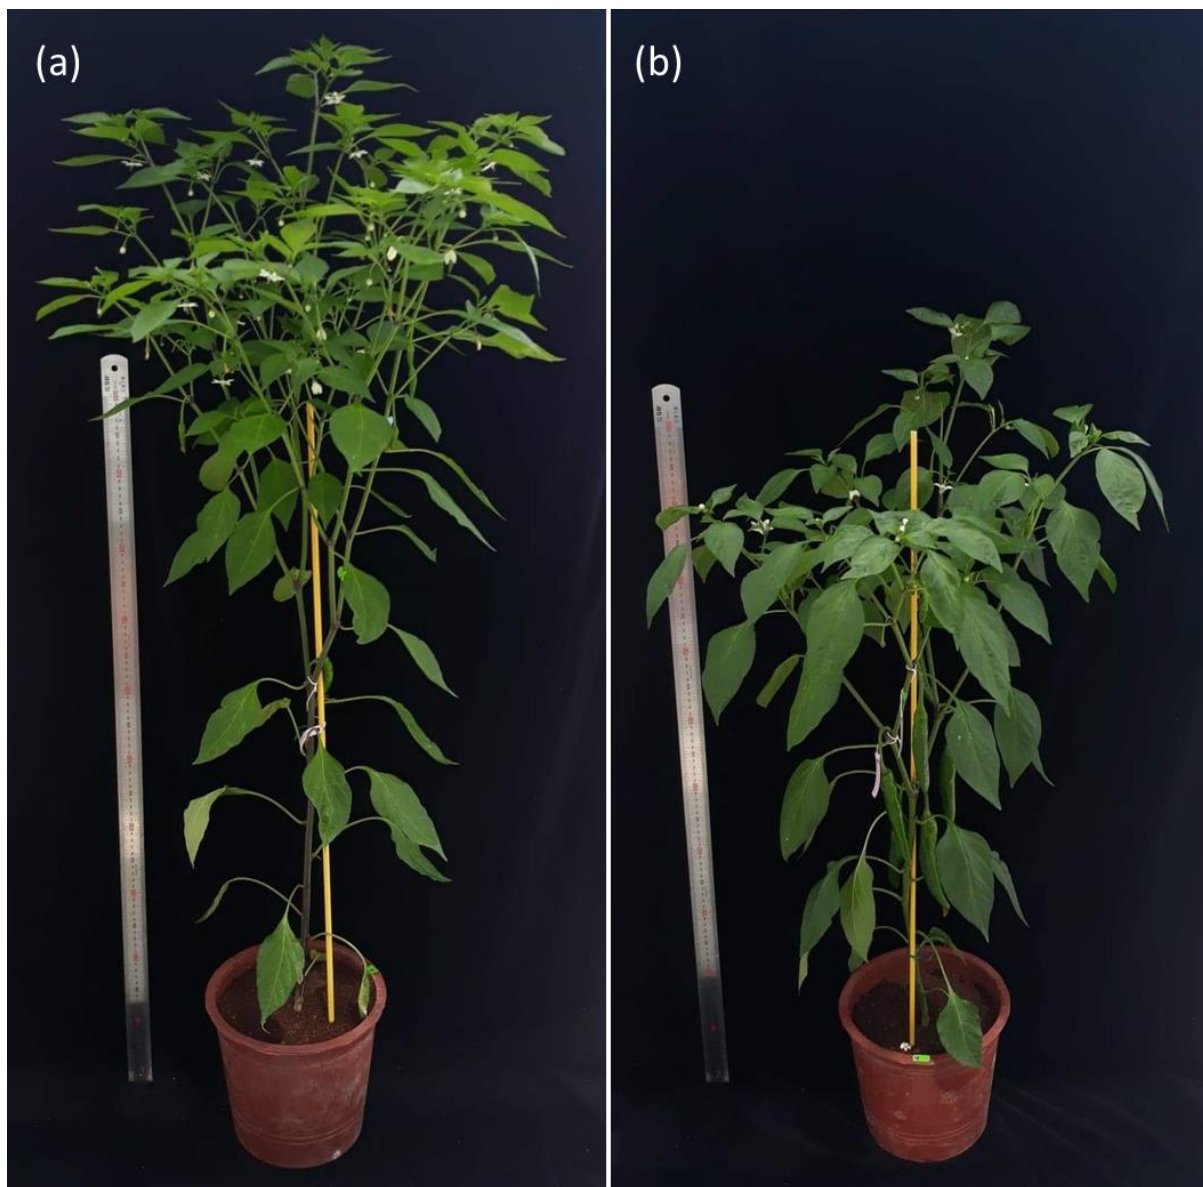

**Supplementary Figure 3.** Hot pepper plants 'Chyung Yang' (a) and 'NW Bigarim' (b) grown in normal temperature.
